# Supplementary material for: Investigation of coastal sea-fog formation using the WIBS (wideband integrated bioaerosol sensor) technique
Source: Copernicus journal article supplement (doi:10.5194/acp-19-5737-2019), 2019-04-30
Supplement: Supplementary file 1 [file acp-19-5737-2019-supplement.pdf]

Supplement of Atmos. Chem. Phys., 19, 5737–5751, 2019  
<https://doi.org/10.5194/acp-19-5737-2019-supplement>  
© Author(s) 2019. This work is distributed under  
the Creative Commons Attribution 4.0 License.

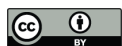

*Supplement of*

## **Investigation of coastal sea-fog formation using the WIBS (wideband integrated bioaerosol sensor) technique**

**Shane M. Daly et al.**

*Correspondence to:* John R. Sodeau ([j.sodeau@ucc.ie](mailto:j.sodeau@ucc.ie))

The copyright of individual parts of the supplement might differ from the CC BY 4.0 License.

### July 15<sup>th</sup> – 16<sup>th</sup>

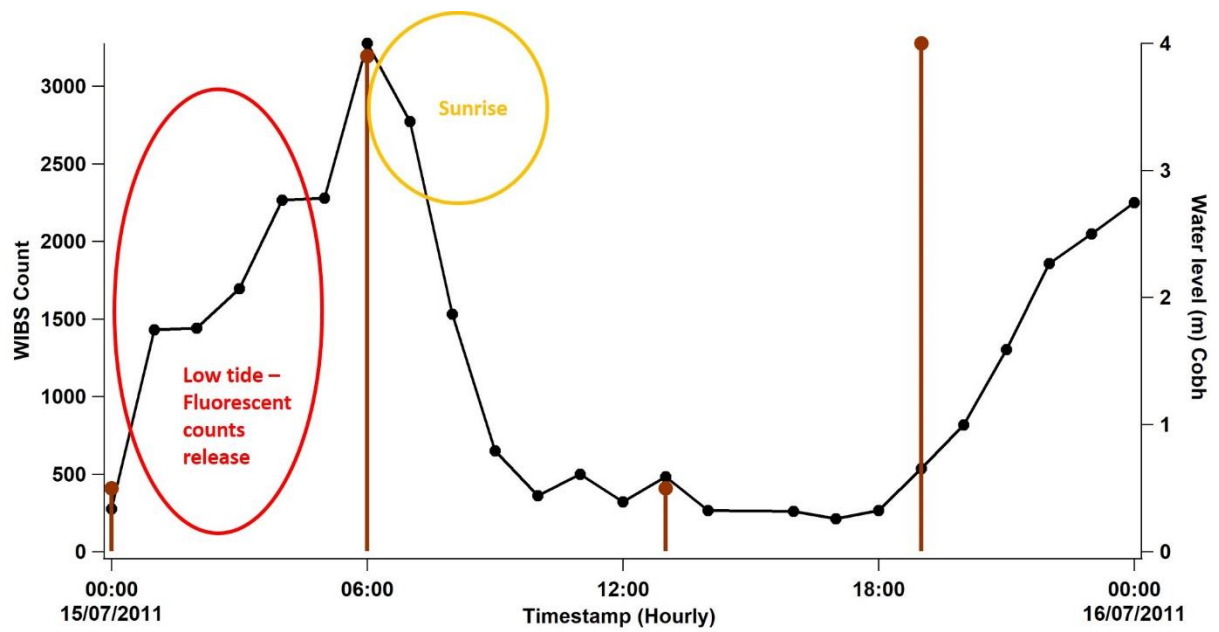

Figure 1: WIBS count, solar and tidal profiles of Haulbowline during the 15<sup>th</sup>-16<sup>th</sup> July 2011

### July 23<sup>rd</sup> – 25<sup>th</sup>

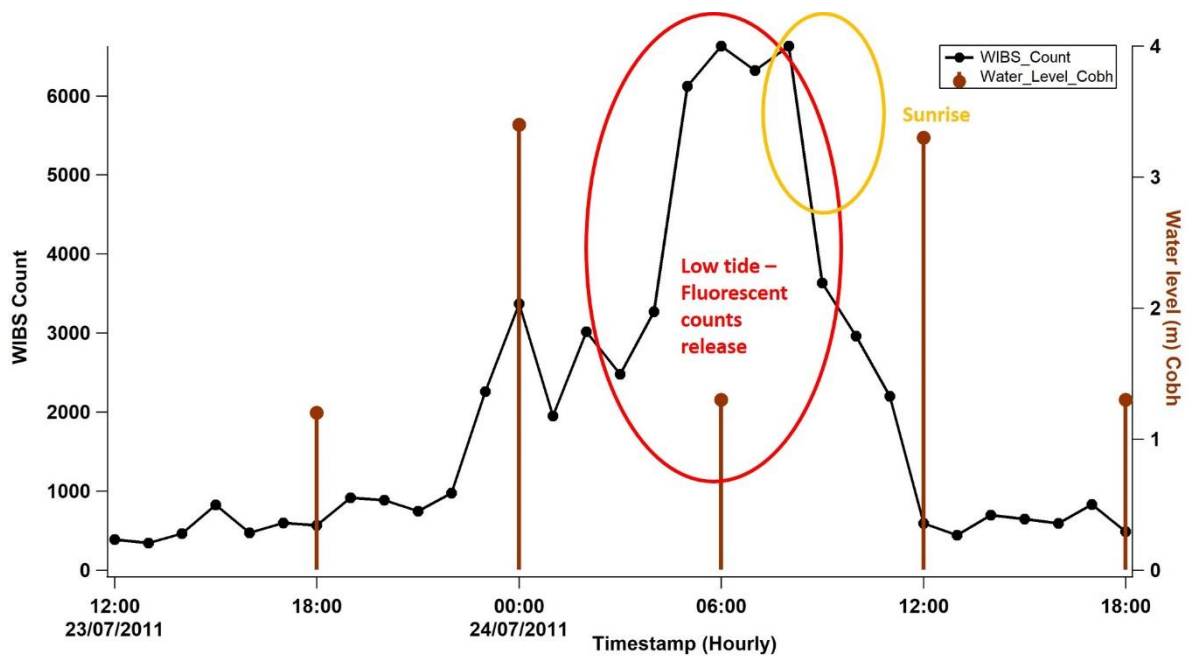

Figure 2: WIBS count, solar and tidal profiles of Haulbowline during the 23<sup>th</sup>-25<sup>th</sup> July 2011

### July 26<sup>th</sup> – 28<sup>th</sup>

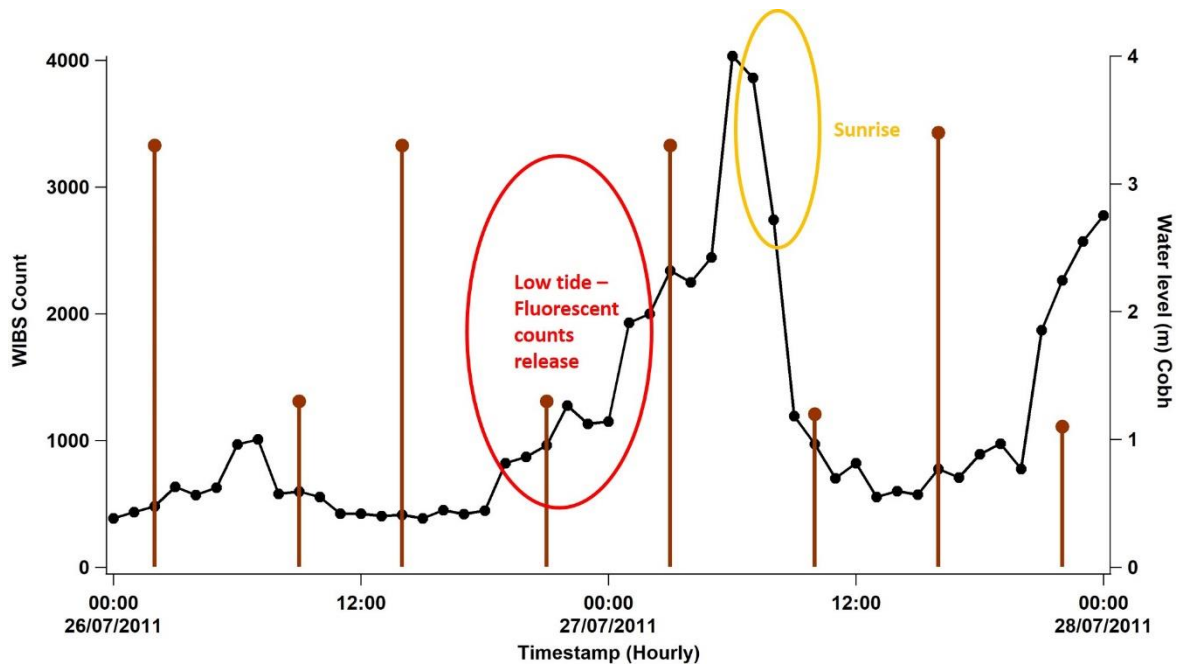

Figure 3: WIBS count, solar and tidal profiles of Haulbowline during the 26<sup>th</sup>-28<sup>th</sup> July 2011
